# Supplementary material
Source: PubMed Central journal article supplement (PMC2427192)
Supplement: mmc1.pdf [file mmc1.pdf]

## Deleterious Mutations in the Zinc-Finger 469 Gene

### Cause Brittle Cornea Syndrome

Almogit Abu, Moshe Frydman, Dina Marek, Eran Pras, Uri Nir, Haike Reznik-Wolf, and Elon Pras

Table S1. Primers for the Amplification of *ZNF469*

|    | Coding Region       | Forward Primer                  | Reverse Primer                | Temp. |
|----|---------------------|---------------------------------|-------------------------------|-------|
| 1  | Exon 1 (Segment 1)  | 5'-ACTCACCCCTGACCTTTCCTTC-3'    | 5'-ACCTGGGAAGCTATTCTCAGCA-3'  | 63°C  |
| 2  | Exon 1 (Segment 2)  | 5'-CCACCAACTATACCTCACCAAGC-3'   | 5'-GCTGGCCGTTAAAGAACATACTC-3' | 62°C  |
| 3  | Exon 1 (Segment 3)  | 5'-TTTACACAAGAGCCTGACCAAAA-3'   | 5'-GAGTGGGTGGGTGGAAGAAG-3'    | 62°C  |
| 4  | Exon 1 (Segment 4)  | 5'-AGCACCTGCTCTTCCCTGTC-3'      | 5'-GAGCTTTGCTCTCTGGAGTCAC-3'  | 61°C  |
| 5  | Exon 1 (Segment 5)  | 5'-CGGCATGGAGTACCAGTCGGACA-3'   | 5'-CTTCTGCCTCGCCGCCTTC-3'     | 71°C  |
| 6  | Exon 2 (Segment 1)  | 5'-AGGAGCTCATTCTGAAGATCGTG-3'   | 5'-TGAAGACAGAACACTGGGTTTGG-3' | 63°C  |
| 7  | Exon 2 (Segment 2)  | 5'-CAAGCCCCGGTCTCCTGATA-3'      | 5'-AAGAGCAACGCTACATCCACTCC-3' | 64°C  |
| 8  | Exon 2 (Segment 3)  | 5'-AGATCCACCGTACCCCTCTTTT-3'    | 5'-GAGGAACCCTCCTCTCTGTTCAC-3' | 63°C  |
| 9  | Exon 2 (Segment 4)  | 5'-GAGCCAACCTCCATTTTCAGC-3'     | 5'-ACTGCAGGGAGAGTTGTCACC-3'   | 62°C  |
| 10 | Exon 2 (Segment 5)  | 5'-CTGGAGTGGCTAAGAGTAAAGATGG-3' | 5'-AATCCTCAGCCCCAGTATCTGTC-3' | 62°C  |
| 11 | Exon 2 (Segment 6)  | 5'-AAGACCCACTTACCTCGCCTTC-3'    | 5'-GGGAGTCAGACTGGAAGTCACTG-3' | 63°C  |
| 12 | Exon 2 (Segment 7)  | 5'-CTGCCTGGAAGGTGAGATGG-3'      | 5'-ATCAGCAGAGACTGGAAGAATGC-3' | 63°C  |
| 13 | Exon 2 (Segment 8)  | 5'-AGCCCTACTGAGCATGAGGTAGA-3'   | 5'-GAAGAGCTGGGAGAAAGAGACCT-3' | 62°C  |
| 14 | Exon 2 (Segment 9)  | 5'-AAGGTGTCTGGGAGGAGAACAC-3'    | 5'-GCCCTCGAAGTCTAAGAAGCTG-3'  | 62°C  |
| 15 | Exon 2 (Segment 10) | 5'-ATTCTGAGCTGCACATGGTC-3'      | 5'-GTCTTTCTTGGCTTCTCCCTCTT-3' | 62°C  |
| 16 | Exon 2 (Segment 11) | 5'-CTTCTGAACAGCATCACGGAAC-3'    | 5'-GAGAGAGCCCTCACTCAGGATG-3'  | 62°C  |
| 17 | Exon 2 (Segment 12) | 5'-CCACATGAACAAGCACCTCAG-3'     | 5'-GGCTTCATCCCATTCTCTGTG-3'   | 62°C  |
| 18 | Exon 2 (Segment 13) | 5'-CATTTCCAGGAAGACCACCTACTT-3'  | 5'-CTTGCCCACTGTCCTTCCCT-3'    | 62°C  |
| 19 | Exon 2 (Segment 14) | 5'-AGGAGAAGGGAGAGAGCAGTACG-3'   | 5'-CAGTTGCACAAGAAGTCAAGTGG-3' | 62°C  |
